# Supplementary material
Source: Springer Nature journal article supplement (https://www.springerprofessional.de/resource/supplementary/13638_2011_375_MOESM3_ESM.pdf/11897648)

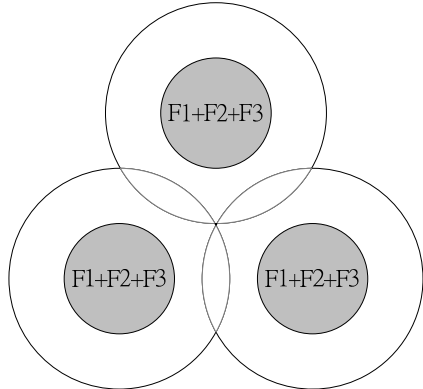

(a)

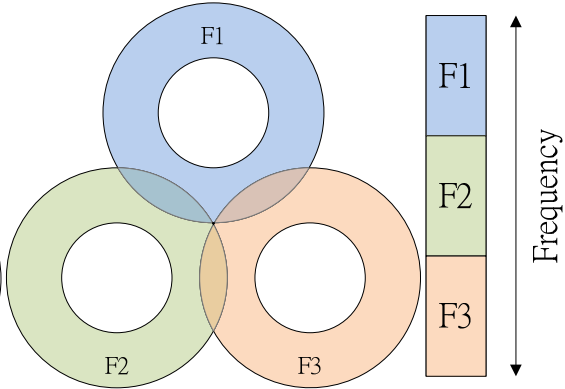

(b)

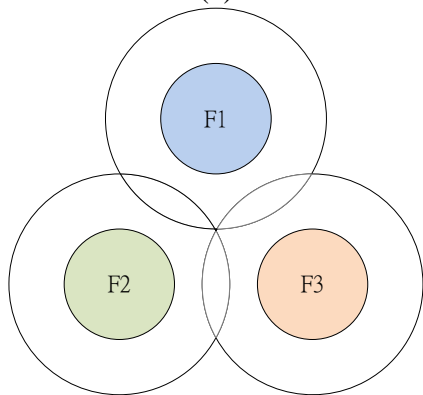

(c)

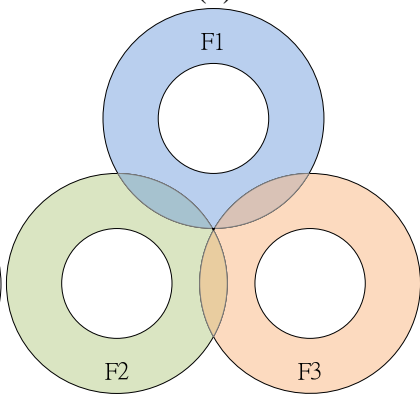

(d)

Supplement: MOESM3 [file 11897648]
